# Supplementary material for: Inhibition of renalase expression and signaling has antitumor activity in pancreatic cancer
Source: PubMed Central journal article supplement (PMC4789641; doi:10.1038/srep22996), 2016-03-14
Supplement: srep22996-s1.pdf [file srep22996-s1.pdf]

**Title:**

Inhibition of renalase expression and signaling has antitumor activity in pancreatic cancer

**Authors:**

Xiaojia Guo<sup>1</sup>, Lindsay Hollander<sup>1,4</sup>, Douglas MacPherson<sup>1</sup>, Ling Wang<sup>2</sup>, Heino Velazquez<sup>1</sup>, John Chang<sup>1</sup>, Robert Safirstein<sup>1</sup>, Charles Cha<sup>3</sup>, Fred Gorelick<sup>1</sup>, and Gary V. Desir<sup>1</sup>

**INVENTORY OF SUPPLEMENTAL INFORMATION**

Figure 1S-9S

Table 1

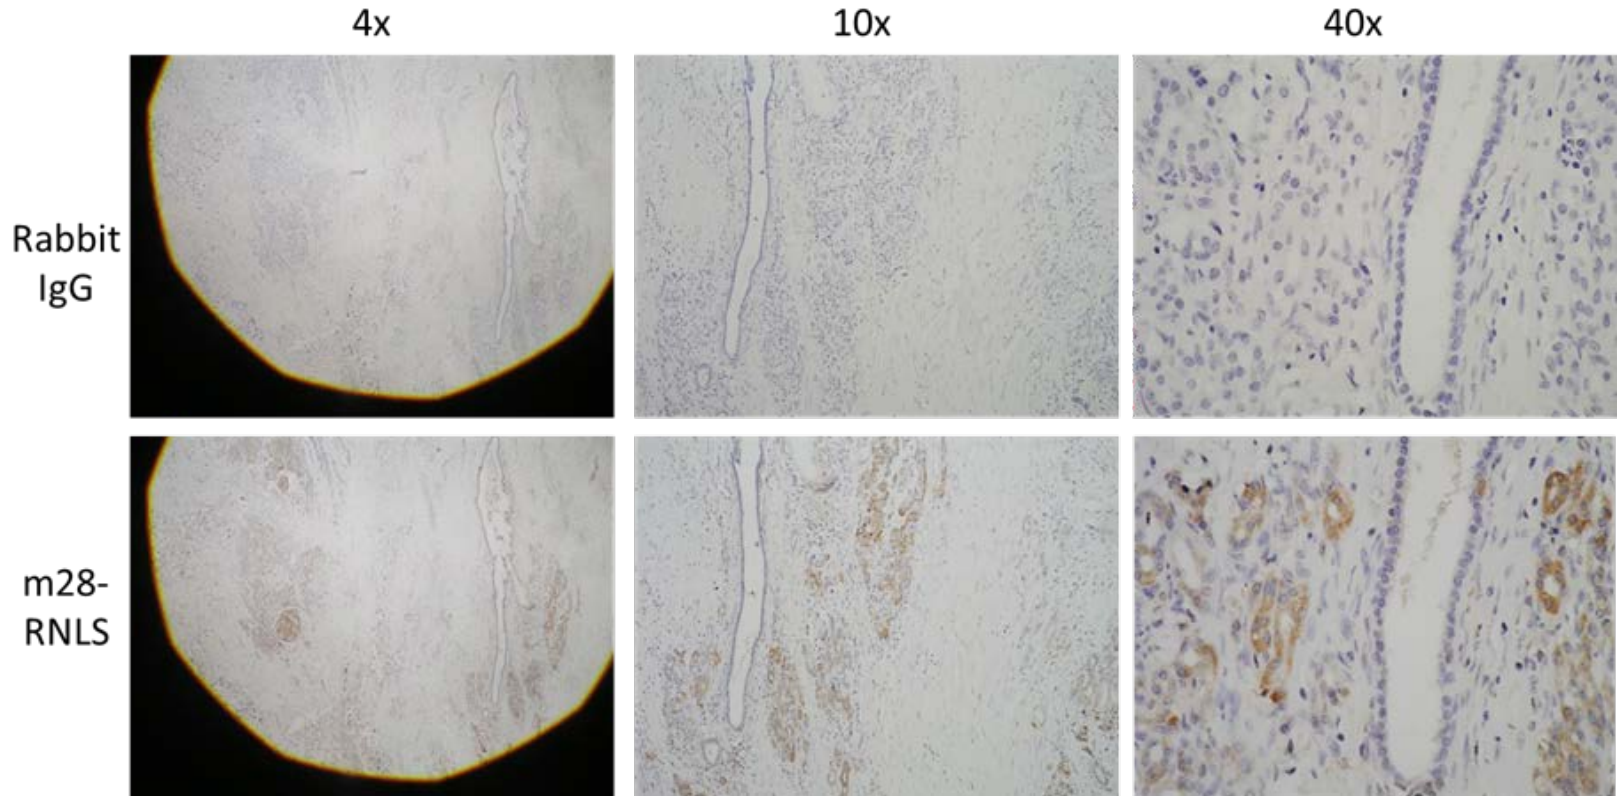

Figure 1S: Localization of RNLs in Grade II PDAC. Representative immunohistochemistry staining for RNLs protein expression (brown) using m28-RNLS in a Grade II human pancreatic ductal adenocarcinoma.

## Supplement 2S

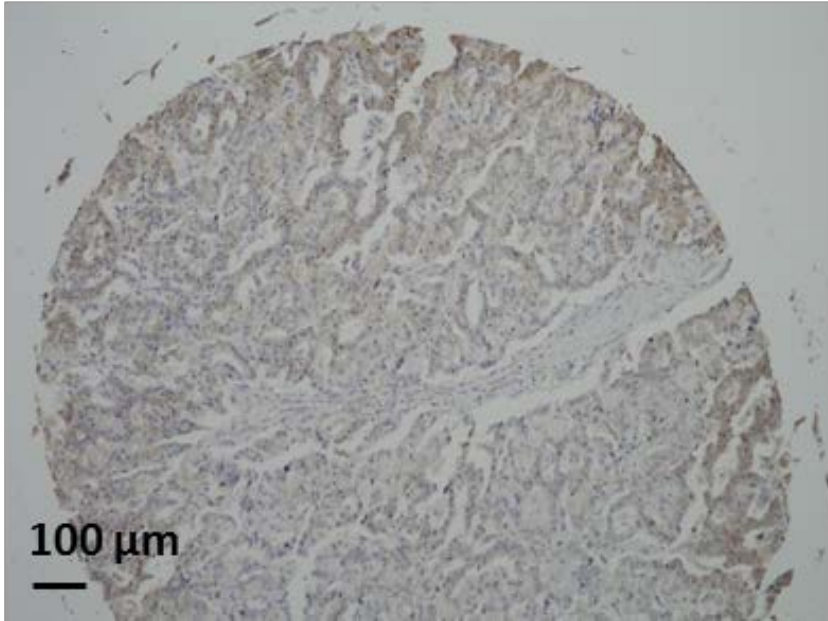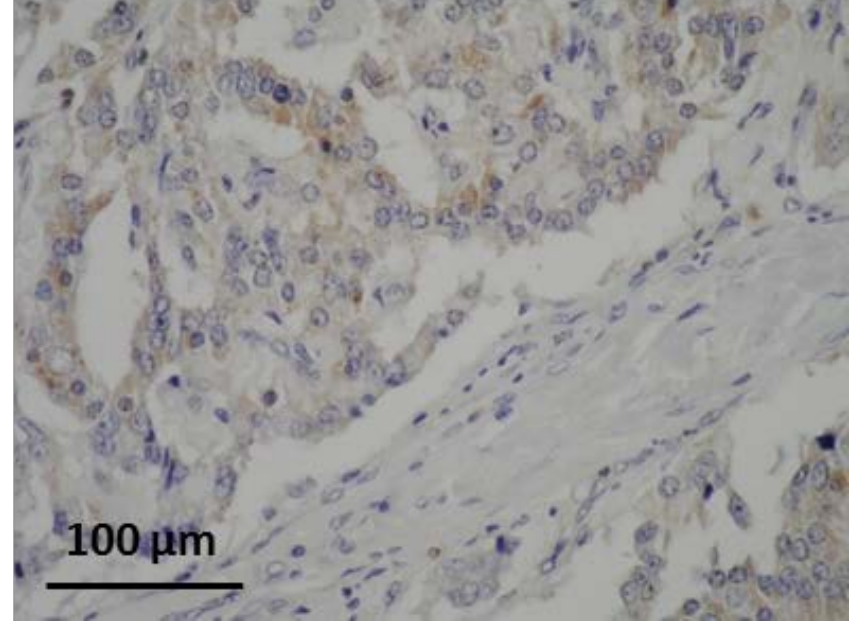

Figure 2S: RNL5 expression in neuroendocrine tumor of the pancreas. Representative immunohistochemistry staining for RNL5 protein expression (brown) using m28-RNL5 in a human neuroendocrine tumor.

3S

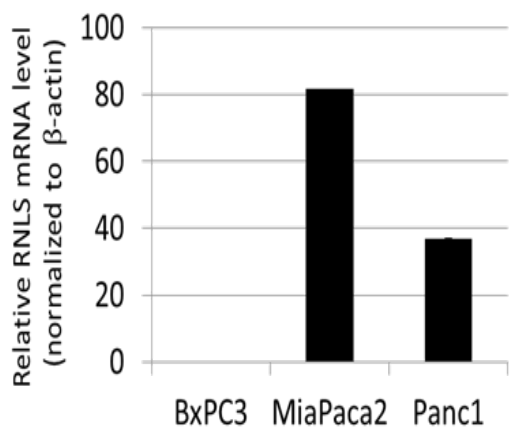

4S

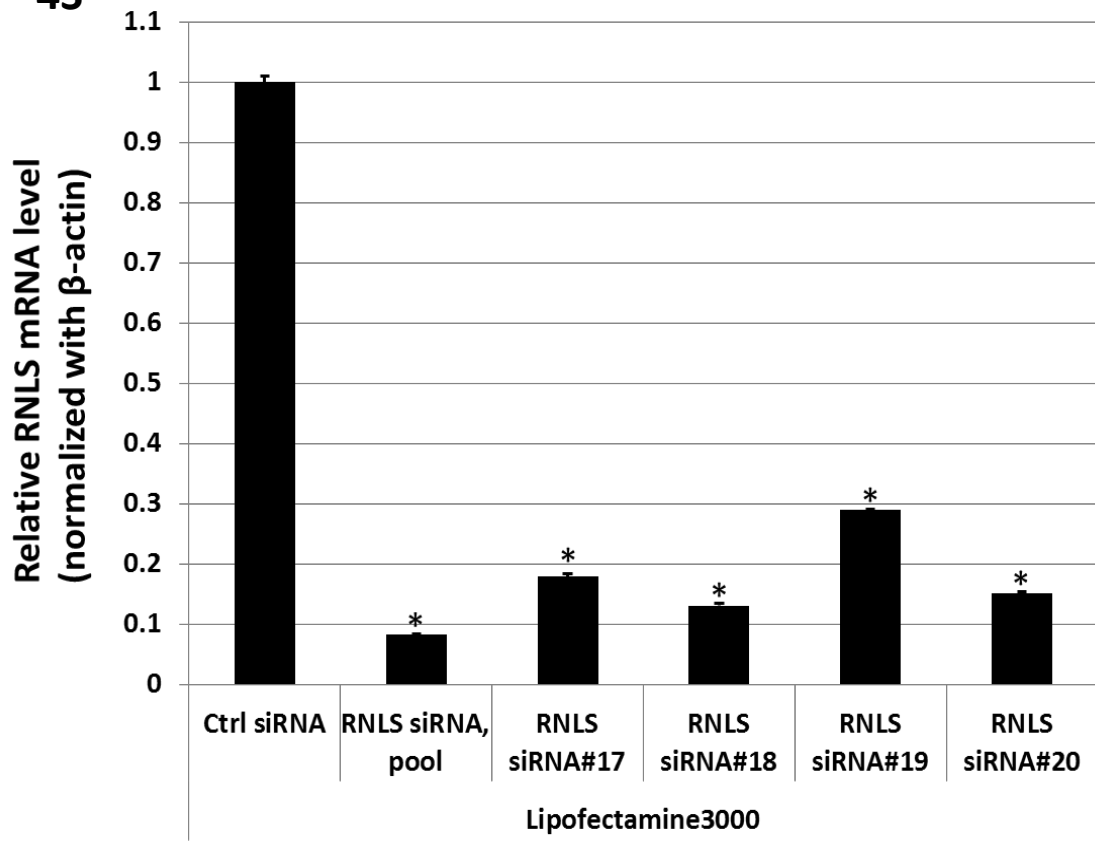

5S

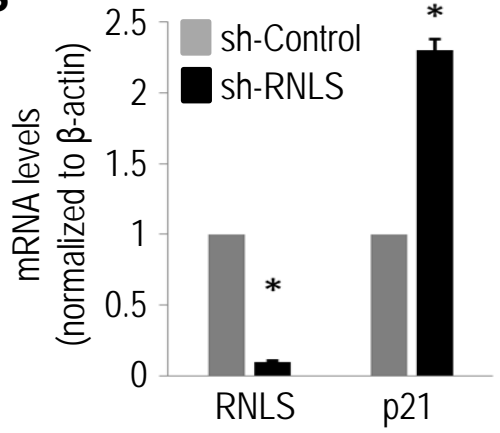

Figure 3S: Renalase mRNA level in pancreatic cancer cell lines. RNL5 mRNA level measured by RT-qPCR.  
Figure 4S: Knockdown of RNL5 expression using siRNA. MiaPaCa2 cells were transfected with indicated siRNA for 3days and RNL5 mRNA levels were measured by RTqPCR.  
Figure 5S: Knockdown of RNL5 expression using shRNA. Panc1 cells were stably transfected with shRNA construct to specifically knockdown RNL5. The RNL5 and p21 mRNA levels were measured by RT-qPCR.

Supplement 6S

Figure 6S: Inhibition of RNLS by monoclonal antibody (clone 28-4) induces PDAC cell apoptosis. Panc1 cells were treated with 28-4 for days followed by flow cytometry analysis. Numbers in the upper left quadrants of dot plots indicate the percentage of necrotic cells; numbers in the upper right quadrants, late apoptotic cells; numbers in the lower left quadrants, viable cells; numbers in the lower right quadrants, early apoptotic cells.

6S

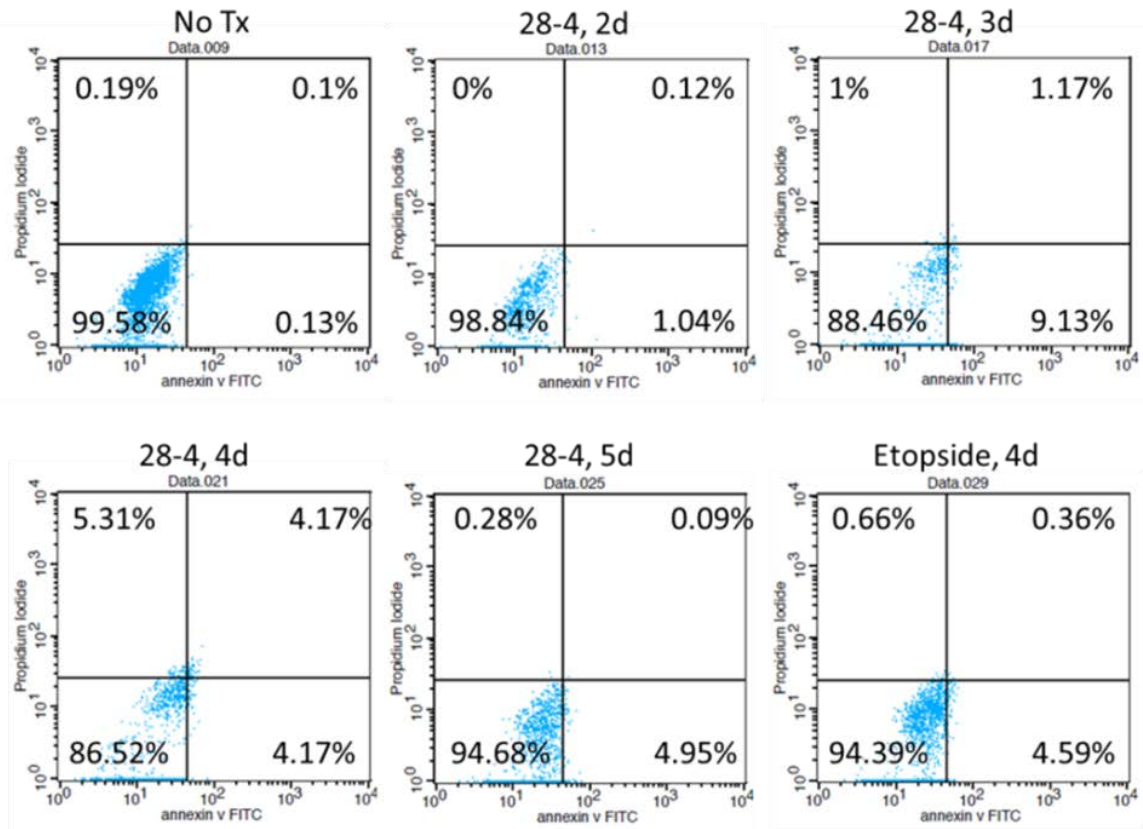

## Supplement 7S

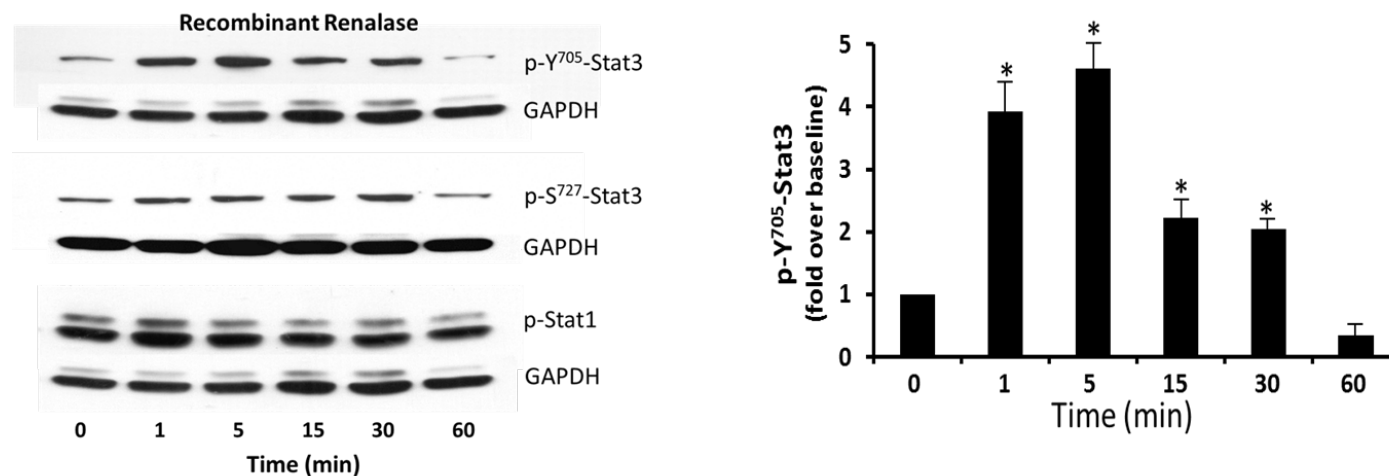

Figure 7S: RNLs activates STAT3 in human embryonic kidney cells (HK-2). *Left panel:* Cells were treated recombinant (30 mcg/ml) and STAT3 and STAT1 phosphorylation determined by Western blotting. *Right panel:* quantification of STAT3 phosphorylation at tyrosine 705 with normalization to GAPDH. n=5, \* indicates p<0.01.

## Supplement 8S, 9S

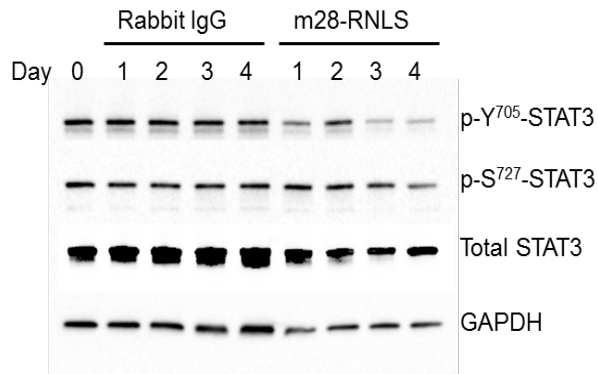

8S: m28-RNLS inhibits STAT3 phosphorylation; Panc1 cells in culture treated with either rabbit IgG or anti- RNLS monoclonal m28-RNLS for up to 4 days, and STAT3 phosphorylation assessed by western blot; p-Ser<sup>727</sup>-STAT3: phosphorylation at serine 727, p-Y<sup>705</sup>-STAT3: phosphorylation at tyrosine 705; GAPDH loading control; representative study.

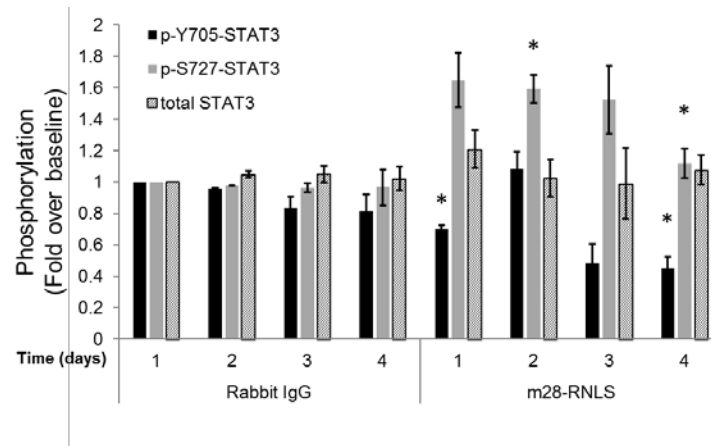

9S: Quantification of STAT3 phosphorylation with m28-RNLS; signals normalized to GAPDH loading control; n=3, \*=P<0.05. m28-RNLS decreases STAT3 phosphorylation at tyrosine 705 by ~60%.

# Supplement Table 1S

**Table 1S.:** Characteristics of patient cohort with PDAC

| Characteristics   |         | Number /Total number |
|-------------------|---------|----------------------|
| Gender            | Female  | 24/69 (34.8%)        |
|                   | Male    | 45/69 (65.2%)        |
| Age (years)       | Median  | 61 (36-85)           |
|                   | 36-50   | 14/69 (20.3%)        |
|                   | 51-69   | 39/69 (56.5%)        |
|                   | 70-85   | 16/69 (23.2%)        |
| Tumor Grade       | 1       | 1/69 (1.4%)          |
|                   | 2       | 48/69 (69.6%)        |
|                   | 3       | 15/69 (21.7%)        |
|                   | 4       | 1/69 (1.4%)          |
|                   | Unknown | 4/69 (5.8%)          |
| Survival (Months) | 0-12    | 29/69 (42%)          |
|                   | 13-24   | 9/69 (13%)           |
|                   | 25-48   | 18/69 (26%)          |
|                   | 49-87   | 13/69 (19%)          |
